# Supplementary material
Source: publisher figshare collection journal article supplement (https://springernature.figshare.com/articles/dataset/_/5418706)
Supplement: Supplementary file 1 [file 1]

## 1 Test results on multiple classifiers

Table 1: Real world data results using KNN classifier

| Selection      | f-score     |             |             |             |             |               |
|----------------|-------------|-------------|-------------|-------------|-------------|---------------|
|                | NIPS        | Ionosphere  | Musk2       | Isolet      | Semeion     | Advertisement |
| Full-dimension | 0.57        | 0.70        | 0.9         | 0.58        | 0.1 265     | 0.73          |
| C4.5           | 0.58        | 0.87        | 0.9         | 0.63        | 0.79        | 0.92          |
| MIC            | 0.78        | 0.83        | 0.86        | 0.78        | 0.78        | 0.91          |
| SFS(KNN)       | 0.84        | 0.85        | 0.91        | **          | **          | **            |
| CFS            | 0.82        | 0.81        | 0.86        | 0.82        | 0.9         | 0.91          |
| ReliefF        | 0.87        | 0.79        | 0.84        | 0.82        | 0.87        | 0.87          |
| mRmR           | 0.55        | 0.89        | 0.9         | 0.57        | 0.9         | 0.9           |
| Doquire        | 0.56        | 0.88        | 0.9         | 0.56        | 0.93        | 0.9           |
| RaR            | <b>0.88</b> | <b>0.88</b> | <b>0.91</b> | <b>0.87</b> | <b>0.92</b> | <b>0.91</b>   |

Table 2: Minimum number of features required to obtain the quality in Table 1

| Selection | NIPS      | Ionosphere | Musk2     | Isolet    | Semeion   | Advertisement |
|-----------|-----------|------------|-----------|-----------|-----------|---------------|
| MIC       | 11        | 2          | 163       | 11        | 82        | 14            |
| SFS(KNN)  | 5         | 2          | 135       | **        | **        | **            |
| CFS       | 15        | 2          | 155       | 15        | 119       | 7             |
| ReliefF   | 20        | 4          | 136       | 20        | 173       | 54            |
| mRmR      | 5         | 5          | 117       | 2         | 151       | 13            |
| Doquire   | 2         | 4          | 117       | 2         | 156       | 15            |
| RaR       | <b>12</b> | <b>2</b>   | <b>16</b> | <b>11</b> | <b>17</b> | <b>9</b>      |

Table 3: Real world data results using Naive Bayes classifier

| Selection      | f-score |            |       |        |         |               |
|----------------|---------|------------|-------|--------|---------|---------------|
|                | Madelon | Ionosphere | Musk2 | Isolet | Semeion | Advertisement |
| Full Dimension | 0.59    | 0.82       | 0.74  | 0.58   | 0.81    | 0.9           |
| MIC            | 0.60    | 0.9        | 0.78  | 0.61   | 0.86    | 0.92          |
| SFS(KNN)       | 0.60    | 0.86       | 0.69  | **     | **      | **            |
| CFS            | 0.6     | 0.91       | 0.7   | 0.61   | 0.85    | 0.94          |
| ReliefF        | 0.61    | 0.9        | 0.72  | 0.6    | 0.85    | 0.92          |
| mRmR           | 0.57    | 0.84       | 0.8   | 0.57   | 0.86    | 0.9           |
| Doquire        | 0.57    | 0.82       | 0.81  | 0.57   | 0.86    | 0.9           |
| RaR            | 0.71    | 0.9        | 0.78  | 0.61   | 0.98    | 0.91          |

Table 4: Minimum number of features required to obtain the quality in Table 3

| Selection | NIPS     | Ionosphere | Musk2    | Isolet   | Semeion   | Advertisement |
|-----------|----------|------------|----------|----------|-----------|---------------|
| MIC       | 16       | 5          | 8        | 16       | 85        | 994           |
| SFS(KNN)  | 475      | 4          | 4        | **       | **        | **            |
| CFS       | 4        | 12         | 4        | 4        | 101       | 171           |
| ReliefF   | 2        | 7          | 6        | 2        | 192       | 993           |
| mRmR      | 1        | 2          | 20       | 2        | 18        | 18            |
| Doquire   | 2        | 2          | 20       | 2        | 9         | 41            |
| RaR       | <b>3</b> | <b>8</b>   | <b>4</b> | <b>1</b> | <b>17</b> | <b>9</b>      |

Table 5: Real world data results using SVM (RBF kernel) classifier

| Selection      | Fscore  |            |       |        |         |               |
|----------------|---------|------------|-------|--------|---------|---------------|
|                | Madelon | Ionosphere | Musk2 | Isolet | Semeion | Advertisement |
| Full Dimension | 0.53    | 0.83       | 0.77  | 0.59   | 0.84    | 0.62          |
| MIC            | 0.61    | 0.85       | 0.78  | 0.61   | 0.91    | 0.89          |
| SFS(KNN)       | 0.60    | 0.85       | 0.79  | **     | **      | **            |
| CFS            | 0.61    | 0.86       | 0.8   | 0.61   | 0.9     | 0.91          |
| ReliefF        | 0.61    | 0.85       | 0.79  | 0.62   | 0.9     | 0.89          |
| mRmR           | 0.53    | 0.88       | 0.81  | 0.62   | 0.9     | 0.8           |
| Doquire        | 0.54    | 0.88       | 0.81  | 0.62   | 0.91    | 0.82          |
| RaR            | 0.68    | 0.85       | 0.81  | 0.62   | 0.92    | 0.88          |

Table 6: Minimum number of features required to obtain the quality in Table 5

| Selection | NIPS     | Ionosphere | Musk2     | Isolet   | Semeion   | Advertisement |
|-----------|----------|------------|-----------|----------|-----------|---------------|
| MIC       | 2        | 9          | 70        | 2        | 135       | 42            |
| SFS(KNN)  | 2        | 16         | 37        | **       | **        | **            |
| CFS       | 1        | 8          | 86        | 1        | 72        | 12            |
| ReliefF   | 34       | 18         | 91        | 34       | 105       | 53            |
| mRmR      | 6        | 23         | 139       | 1        | 100       | 11            |
| Doquire   | 2        | 23         | 139       | 1        | 108       | 11            |
| RaR       | <b>3</b> | <b>3</b>   | <b>52</b> | <b>1</b> | <b>65</b> | <b>4</b>      |

## 2 RaR parameters

Table 7: RaR parameters used to obtain the results

| Data          | M    | k | Number of iterations for estimating Def 1 | $\alpha$ |
|---------------|------|---|-------------------------------------------|----------|
| NIPS          | 1000 | 5 | 250                                       | 0.15     |
| Ionosphere    | 800  | 3 | 250                                       | 0.02     |
| Musk2         | 1000 | 4 | 100                                       | 0.03     |
| Isolet        | 1000 | 4 | 250                                       | 0.15     |
| Semeion       | 1500 | 3 | 200                                       | 0.2      |
| Advertisement | 1000 | 4 | 100                                       | 0.18     |

## 3 Proof 1

Given a subspace  $X$  and a target  $Y$ ,  $KLD(P(Y|X)||P(Y))$  converges to mutual information.

$$\begin{aligned}
 E_X[KLD(P(Y|X) || P(Y))] &= \sum_X P(X) \sum_Y P(Y|X) \log\left(\frac{P(Y|X)}{P(Y)}\right) \\
 &= \sum_X \sum_Y P(X)P(Y|X) \log\left(\frac{P(Y|X)}{P(Y)}\right) \\
 &= \sum_X \sum_Y P(X, Y) \log\left(\frac{P(Y|X)}{P(Y)}\right) \text{ (Rewrite } P(X, Y) = P(Y|X)P(X)\text{)} \\
 &= \sum_X \sum_Y P(X, Y) \log\left(\frac{P(X)P(Y|X)}{P(X)P(Y)}\right) \\
 &= \sum_X \sum_Y P(X, Y) \log\left(\frac{P(X, Y)}{P(X)P(Y)}\right) \\
 &= I(X, Y)
 \end{aligned}$$

When relevance is calculated on a data set with  $n$  samples, we randomly choose slices with an approximately equal number of samples  $m < n$ . This way the expected value is estimated as  $E_X[KLD(P(Y|X) || P(Y))]$ . Note that this equality only holds if we use the conditional distribution as the first one and the marginal as second.
